# Supplementary material for: The relative incidence of fracture non-union in the Scottish population (5.17 million): a 5-year epidemiological study
Source: PubMed Central journal article supplement — BMJ Open. 2013 Feb 8;3(2):e002276. doi: 10.1136/bmjopen-2012-002276 (PMC3586107; doi:10.1136/bmjopen-2012-002276), 2013-02-08
Supplement: bmjopen-2012-002276.draft_revisions.pdf [file bmjopen-2012-002276.draft_revisions.pdf]

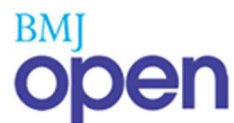

**THE RELATIVE INCIDENCE OF FRACTURE NON-UNION IN A  
POPULATION OF 5.17 MILLION PEOPLE; AN  
EPIDEMIOLOGICAL STUDY.**

|                                 |                                                                                                                                                                                           |
|---------------------------------|-------------------------------------------------------------------------------------------------------------------------------------------------------------------------------------------|
| Journal:                        | <i>BMJ Open</i>                                                                                                                                                                           |
| Manuscript ID:                  | bmjopen-2012-001006                                                                                                                                                                       |
| Article Type:                   | Research                                                                                                                                                                                  |
| Date Submitted by the Author:   | 03-Mar-2012                                                                                                                                                                               |
| Complete List of Authors:       | Mills, Leanora; Stanmore royal national orthopaedic hospital, Paediatric orthopaedics<br>Simpson, Hamish; University of Edinburgh, Trauma and Orthopaedic Surgery                         |
| <b>Primary Subject Heading</b>: | Surgery                                                                                                                                                                                   |
| Secondary Subject Heading:      | Epidemiology                                                                                                                                                                              |
| Keywords:                       | Adult orthopaedics < ORTHOPAEDIC & TRAUMA SURGERY, EPIDEMIOLOGY, Trauma management < ORTHOPAEDIC & TRAUMA SURGERY, Limb reconstruction < ORTHOPAEDIC & TRAUMA SURGERY, Fracture Non-union |
|                                 |                                                                                                                                                                                           |

SCHOLARONE™  
Manuscripts

1 TITLE: THE RELATIVE INCIDENCE OF FRACTURE NON-UNION IN A POPULATION OF  
2 5.17 MILLION PEOPLE; AN EPIDEMIOLOGICAL STUDY.  
3  
4

5 Corresponding author:

6 Leanora@doctors.org.uk  
7  
8  
9

10 Authors:

11 Miss Leanora A Mills

12 Professor Hamish Simpson  
13  
14

15  
16 Miss Leanora A Mills, Paediatric Orthopaedic Fellow, Royal National Orthopaedic Hospital,  
17 Brockley Hill, Stanmore, London, HA7 4LP  
18  
19

20  
21 Professor A Hamish R W Simpson, Department of Orthopaedics and Trauma Surgery, University of  
22 Edinburgh, Old Dalkeith Road, Edinburgh, EH16 4SU  
23  
24

25  
26 Key words: non-union, nonunion, fracture, incidence, epidemiology, bone.  
27  
28

29  
30 Word Count: 2000 excluding abstract  
31  
32

33 The Corresponding Author has the right to grant on behalf of all authors and does grant on behalf of  
34 all authors, an exclusive licence (or non exclusive for government employees) on a worldwide basis  
35 to the BMJ Publishing Group Ltd to permit this article (if accepted) to be published in BMJ editions  
36 and any other BMJ PGL products and sublicences such use and exploit all subsidiary rights, as set  
37 out in our licence.  
38  
39  
40  
41  
42

43 No ethical approval was required for this research.  
44  
45

46 There was no support from any organisation for the submitted work; no financial relationships with  
47 any organisations that might have an interest in the submitted work in the previous three years, no  
48 other relationships or activities that could appear to have influenced the submitted work.  
49  
50  
51

52  
53 The authors Miss L Mills and Prof. H Simpson have contributed to the paper regarding its design,  
54 data acquisition and analysis, both authors have been involved in the drafting and revising of the  
55 article and in the approval of the final version to be published.  
56  
57  
58  
59  
60

1  
2  
3  
4  
5  
6  
7  
8  
9  
10  
11  
12  
13  
14  
15  
16  
17  
18  
19  
20  
21  
22  
23  
24  
25  
26  
27  
28  
29  
30  
31  
32  
33  
34  
35  
36  
37  
38  
39  
40  
41  
42  
43  
44  
45  
46  
47  
48  
49  
50  
51  
52  
53  
54  
55  
56  
57  
58  
59  
60

TITLE: THE RELATIVE INCIDENCE OF FRACTURE NON-UNION IN A POPULATION OF 5.17 MILLION PEOPLE; A CROSS-SECTION EPIDEMIOLOGICAL STUDY.

#### Abstract

Objectives: In the UK there are approximately 850,000 new fractures seen each year. Rates of non-union of 5-10% of fractures have been suggested, the cost to the NHS of treating non-union has been reported to range between £7,000 and £79,000 per person yet there is little actual data available. The objective of this epidemiological study therefore is for the first time to report the rates of fracture non-union.

Design: A CROSS-SECTION EPIDEMIOLOGICAL STUDY

Setting: The population of Scotland

Participants: All patient admissions to hospital in Scotland are coded according to diagnosis. This data is collected by (and was obtained from) ISD Scotland. Those who have been coded for a bone non-union between 2005 and 2010 were included in the study. No patients were excluded.

Population data was obtained from the Registrar General for Scotland.

Outcome measure: The number of fracture non-unions per 100,000 population of Scotland according to age, sex and anatomical distribution of non-union.

Results: 4895 non-unions were treated as inpatients in Scotland between 2005 and 2010, averaging 979 per year, with an overall incidence of 18.94 per 100,000 population per annum. The distribution according to gender was 57% male and 43% female. The overall peak incidence according to age was between 30 and 40 years. The mean population of Scotland between 2005-2010 was 5,169,140 people.

Conclusion: Fracture non-union in the population as a whole remains low at less than 20 per 100,000 population and peaks in the 4<sup>th</sup> decade of life. Further research is required to determine the risk of non-union per fracture according to age/ sex/ anatomical distribution.

1 TITLE: THE RELATIVE INCIDENCE OF FRACTURE NON-UNION IN A POPULATION OF  
2 5.17 MILLION PEOPLE; A CROSS-SECTIONAL EPIDEMIOLOGICAL STUDY.  
3  
4

5  
6  
7 Aim

8 To perform an epidemiological study at a national population level to determine the number (and  
9 incidence) of non-union with respect to anatomical site, sex and age.  
10  
11

12  
13 Introduction

14 The WHO recognize trauma as a major healthcare epidemic with over 16,000 people dying each  
15 day and injury accounting for 16% of the global burden of disease<sup>1</sup>. People in a low income setting  
16 are far more likely to suffer complications from traumatic injury than those in a high income  
17 setting; for instance Mock et al<sup>2</sup> report a 6 fold higher mortality rate (36% v 6%) in the severely  
18 injured between high and low income areas. Even within Europe there are major inequalities  
19 recognised in the provision of trauma care between Eastern and Western states with a 3.6 fold  
20 difference in injury related mortality between the high income and low/middle income countries<sup>3</sup>.  
21 For every trauma-associated death there are many more injured and for these injured individuals  
22 non-union of the fracture is one of the major causes of morbidity and creates a significant drain on a  
23 country's resources. However there is a paucity of data available regarding the incidence of non-  
24 union on a national scale.  
25  
26  
27  
28  
29  
30  
31  
32  
33  
34

35 In the UK there are approximately 850,000 new fractures seen each year (based on an incidence of  
36 fresh fractures of 13.8/1000/pa<sup>4</sup>) of which the majority heal without difficulty.  
37

38 Rates of non-union of 5-10% of fractures have been suggested yet there is little available data for  
39 this figure. The cost to the NHS of treating non-union has been reported to range between £7,000  
40 and £79,000 per person<sup>5-8</sup>. However, this does not take into account the morbidity and loss of  
41 earnings of the individual nor any long-term health burden, so the cost to society will be far greater  
42 than this.  
43  
44  
45  
46

47 Complex non-unions are best treated by a specialist limb reconstruction service. In order to plan the  
48 provision of these services, countries and health boards require data on the rates of non-union per  
49 head of population. In addition, in order to design prospective clinical research studies on non-  
50 union it is necessary to know the incidence so that realistic recruitment rates can be calculated.  
51

52 The aim of this study therefore is for the first time to report the rates of fracture non-union of  
53 different anatomical regions for a large population, taking into account the age and sex distribution.  
54  
55  
56  
57  
58  
59  
60

## Method

Non-union data: Every patient that is admitted to hospital in Scotland is coded for a diagnosis on discharge using the ICD-10 classification by trained coders at each [respective](#) hospital. This data is collected by ISD Scotland (Information Services Division, a department within NHS Scotland) where all health data for Scotland is managed.

Information was obtained about all the non-unions admitted to hospital in Scotland from 2005 to 2010. Patients were coded as having a non-union if the responsible surgeon for that inpatient episode recorded the diagnosis of non-union in the patient notes or correspondence. All patients coded for non-union were included.

To assess the quality and consistency of hospital coding for non-union, we crosschecked the codes of 100 consecutive patients whom had been treated for NU as inpatients in Lothian over a similar time period. 97% had been coded for correctly.

Population data: The population data was obtained from the Registrar General for Scotland who publish an annual mid year population estimate with details of sex, age, council and health board.

## Results

4895 non-unions were treated as inpatients in Scotland between 2005 and 2010, averaging 979 per year, [with an overall incidence of 18.94 per 100,000 population per annum. The distribution according to gender was 57% male and 43% female. The overall peak incidence according to age](#) was between 30 and 40 years. The mean population of Scotland between 2005-2010 was 5,169,140 people.

Table 1- Non-union numbers Scotland 2005- 2010

| Site Location                                 | 0-14yrs | 15-29yrs | 30-44yrs | 45-59yrs | 60-74yrs | 75yrs+ | total |
|-----------------------------------------------|---------|----------|----------|----------|----------|--------|-------|
| Shoulder<br>Region<br>(Clavicle &<br>Scapula) | 2       | 106      | 163      | 171      | 109      | 45     | 596   |
| Upper Arm<br>(Humerus)                        | 10      | 41       | 93       | 184      | 228      | 178    | 734   |
| Forearm<br>(Radius &<br>Ulna)                 | 79      | 435      | 359      | 166      | 129      | 58     | 1226  |
| Hand                                          | 3       | 120      | 65       | 37       | 13       | 3      | 241   |
| Pelvis &<br>Femur                             | 7       | 38       | 76       | 114      | 169      | 175    | 579   |
| Lower Leg<br>(Patella, Tibia<br>& Fibula)     | 35      | 137      | 189      | 168      | 94       | 49     | 672   |
| Ankle & Foot                                  | 15      | 95       | 113      | 141      | 81       | 41     | 486   |
| Axial skeleton                                | 0       | 15       | 13       | 13       | 30       | 17     | 88    |
| Multiple Sites                                | 0       | 4        | 2        | 3        | 2        | 1      | 12    |
| No Additional<br>Detail                       | 29      | 51       | 60       | 46       | 47       | 28     | 261   |
| Total                                         | 180     | 1042     | 1133     | 1043     | 902      | 595    | 4895  |

Overall the actual numbers of non-unions treated were distributed fairly evenly across the ages from 15 to 75 years (table 1). The majority of non-unions occurred in the working aged population.

However the incidence per capita demonstrated a different distribution. As expected less than 4% of

1 non-unions were accounted for by the paediatric population with 66% in the 15- 60 year olds and  
 2 30% in those older than 60 years.  
 3  
 4  
 5

6 5-year trend of non-union (table 2).  
 7

8 The mean incidence of NU over the 5 year period was 22.45 in males and 15.65 in females per  
 9 100,000 population per annum. The incidence of non-union in females has remained constant over  
 10 11 the past 5 years. In males it has fallen, with a 9.3% drop in non-union numbers despite a rise in the  
 12 13 male population, thus the non-union incidence has fallen by 10.5% either due to a fall in the fracture  
 14 15 incidence or improvement in overall management and healing of fractures since 2005. Non-union  
 16 17 incidence has remained consistently higher in the male compared to the female population although  
 18 19 with the fall in numbers of non-union in male patients the gap has narrowed.  
 20  
 21  
 22  
 23

24 Table 2. A 5-year summary of non-union from 2005 to 2010

| NU patient numbers |        |       |       | Incidence/ 100,000 |       |       |
|--------------------|--------|-------|-------|--------------------|-------|-------|
| Year               | Female | Male  | Total | Female             | Male  | Total |
| 2005/06            | 402    | 619   | 1021  | 15.18              | 25.07 | 19.95 |
| 2006/07            | 419    | 559   | 978   | 15.76              | 22.49 | 19.01 |
| 2007/08            | 420    | 576   | 996   | 15.74              | 23.04 | 19.27 |
| 2008/09            | 426    | 532   | 958   | 15.9               | 21.15 | 18.44 |
| 2009/10            | 421    | 521   | 942   | 15.64              | 20.59 | 18.04 |
| 5 year mean        | 417.6  | 561.4 | 979   | 15.65              | 22.45 | 18.94 |

25  
 26  
 27  
 28  
 29  
 30  
 31  
 32  
 33  
 34  
 35  
 36  
 37  
 38  
 39  
 40  
 41  
 42  
 43  
 44  
 45  
 46  
 47  
 48  
 49 Distribution of non-union with age and sex

50 Graph 1 demonstrates that the pattern of non-union varied in three age groups; the paediatric  
 51 52 population had a very low incidence (less than 5 per 100,000 per annum) followed by a sharp rise  
 53 54 and a plateau which was observed in the 20- 70 year age group at around 20 NU per 100,000  
 55 56 population per year. A second rise and further plateau was observed in the elderly at about 28 per  
 57 58 100,000 per annum.  
 59  
 60

1  
2  
3  
4  
5  
6  
7  
8  
9  
10  
11  
12  
13  
14  
15  
16  
17  
18  
19  
20  
21  
22  
23  
24  
25  
26  
27  
28  
29  
30  
31  
32  
33  
34  
35  
36  
37  
38  
39  
40  
41  
42  
43  
44  
45  
46  
47  
48  
49  
50  
51  
52  
53  
54  
55  
56  
57  
58  
59  
60

When the data was divided into the separate sexes a different pattern was evident. In the males there was a high peak in the early adult years (25-29 year olds), accounted for mostly by forearm non-union, followed by a gradual decline in incidence and a second small peak in the eighth decade due to a rise in the incidence of humeral and femur/ pelvis non-unions. In the female population there was a consistently steady increase in NU incidence from childhood onwards with the female incidence over taking that of the males in the 50-60 year age group and peaking in the 75-79 year age group. Similar to the male population, this peak was predominantly due to an increased incidence of humeral and femoral/ pelvis non-unions.

This distribution of non-union reflected the bimodal (male) and unimodal (female) distribution of fresh fractures that has been reported with age and sex in adults<sup>9</sup>.



Graph 1- Incidence of non-union with age and sex

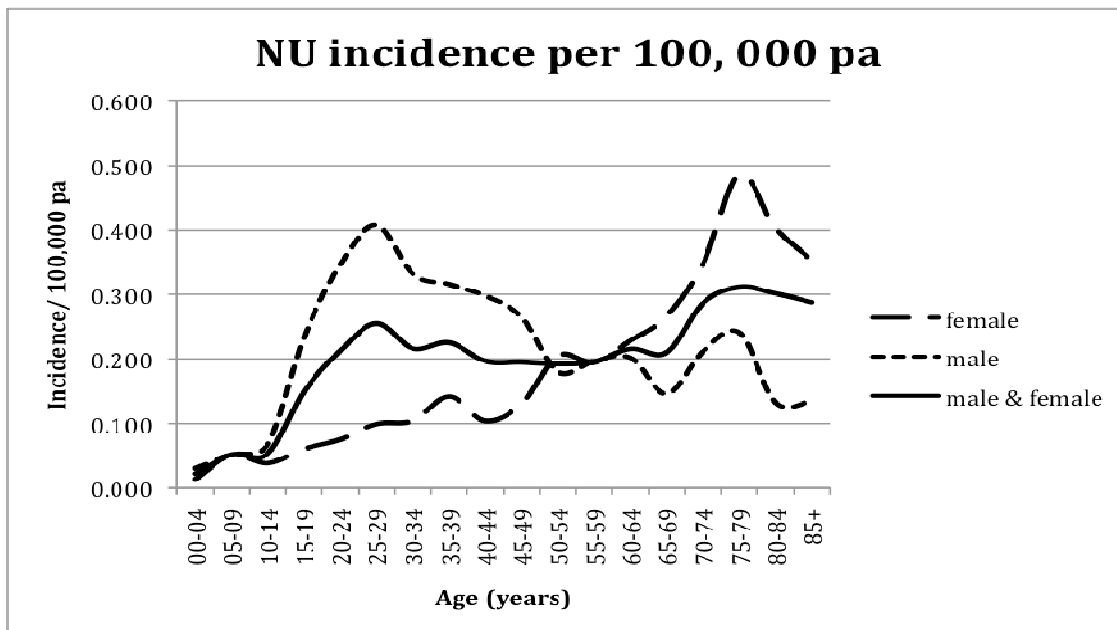

#### Anatomical distribution of non-union

Table 3 and graphs 2a and b detail the incidence of non-union by site and age. Non-union occurred 60% more frequently in the upper than the lower limb. 5% of non-union patients coded had data unavailable regarding their specific anatomical site.

Notably the forearm had the highest NU rate overall, 2.5 times more common in males (6.68/ 100,000) than in females (2.79/ 100,000) with the majority of cases occurred in the younger population. The hand had one of the lowest rates of NU and these occurred predominantly in the young male patients (1.5/ 100,000) compared to females (0.4/ 100,000).

The humerus was the most frequent site of NU in females (3.54 per 100,000 population) and this became a greater problem with increasing age, representing the increasing number of osteopaenia related proximal humerus fractures in the elderly. The shoulder, which was predominantly the clavicle, was affected 50% more frequently in males but with a more even distribution across the ages.

In the lower limb, NU of the femur and pelvis was more common in females, the incidence increased from the sixth decade upwards following a similar trend to that of the humerus. The highest rate of non-union in the lower limb was seen in the male leg: Non-union of the tibia and

fibula was the second highest site of non-union overall, 70% more frequent than any other area of the lower limb and twice as common in males (3.4/ 100,000) than in females (1.8/100,000). NU of the foot and ankle was evenly distributed between the sexes and across the ages.

Non-union of multiple sites and the axial skeleton was very rare.

Table 3. Incidence of non-union by sex and anatomy

| Site Location                                      | Female<br>incidence /100,000 pa | Male<br>incidence /100,000 pa | Total<br>incidence /100,000 pa |
|----------------------------------------------------|---------------------------------|-------------------------------|--------------------------------|
| <a href="#">Shoulder Region<br/>(Clavicle)</a>     | 1.87                            | 2.77                          | 2.31                           |
| <a href="#">Upper Arm<br/>(Humerus)</a>            | 3.54                            | 2.1                           | 2.84                           |
| <a href="#">Forearm<br/>(Radius &amp; Ulna)</a>    | 2.79                            | 6.83                          | 4.74                           |
| <a href="#">Hand</a>                               | 0.4                             | 1.5                           | 0.93                           |
| Upper limb total                                   | 8.6                             | 13.2                          | 10.82                          |
| <a href="#">Pelvis &amp; Femur</a>                 | 2.43                            | 2.04                          | 2.24                           |
| <a href="#">Lower Leg<br/>(Tibia &amp; Fibula)</a> | 1.83                            | 3.42                          | 2.6                            |
| <a href="#">Ankle &amp; Foot</a>                   | 1.77                            | 2                             | 1.88                           |
| Lower limb total                                   | 6.02                            | 7.46                          | 6.72                           |
| Multiple Sites                                     | 0.04                            | 0.06                          | 0.05                           |
| Axial skeleton                                     | 0.25                            | 0.44                          | 0.34                           |
| Total                                              | 15.65                           | 22.45                         | 18.94                          |

Graph 2a & 2b- distribution of non-union by site and age, upper and lower limb

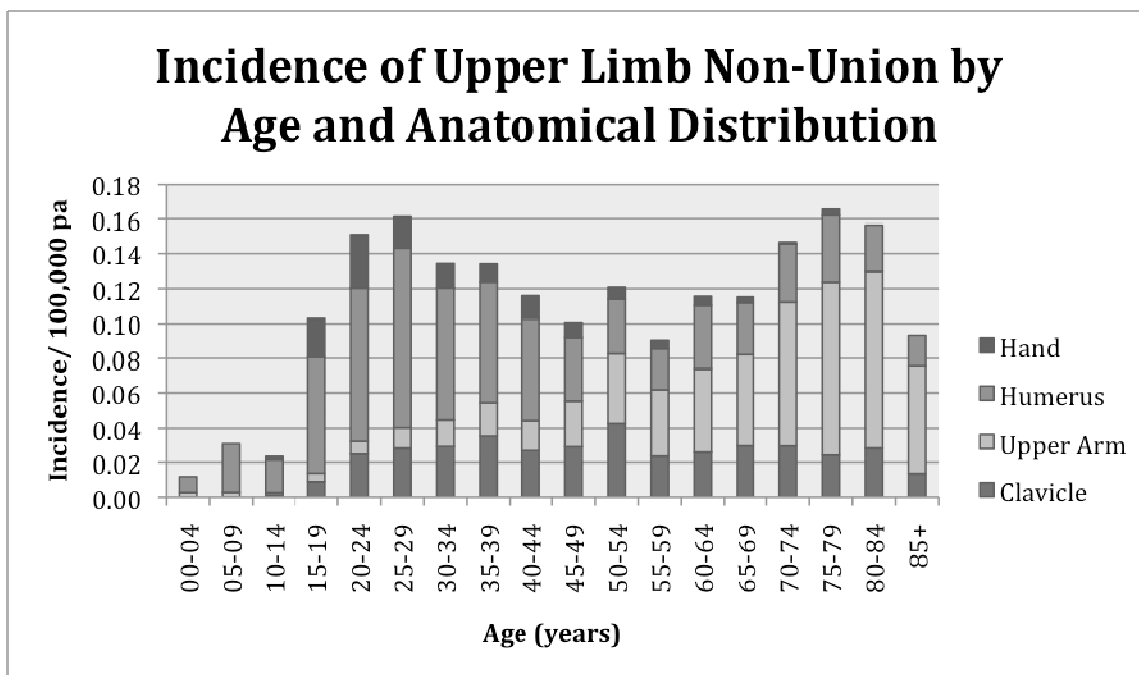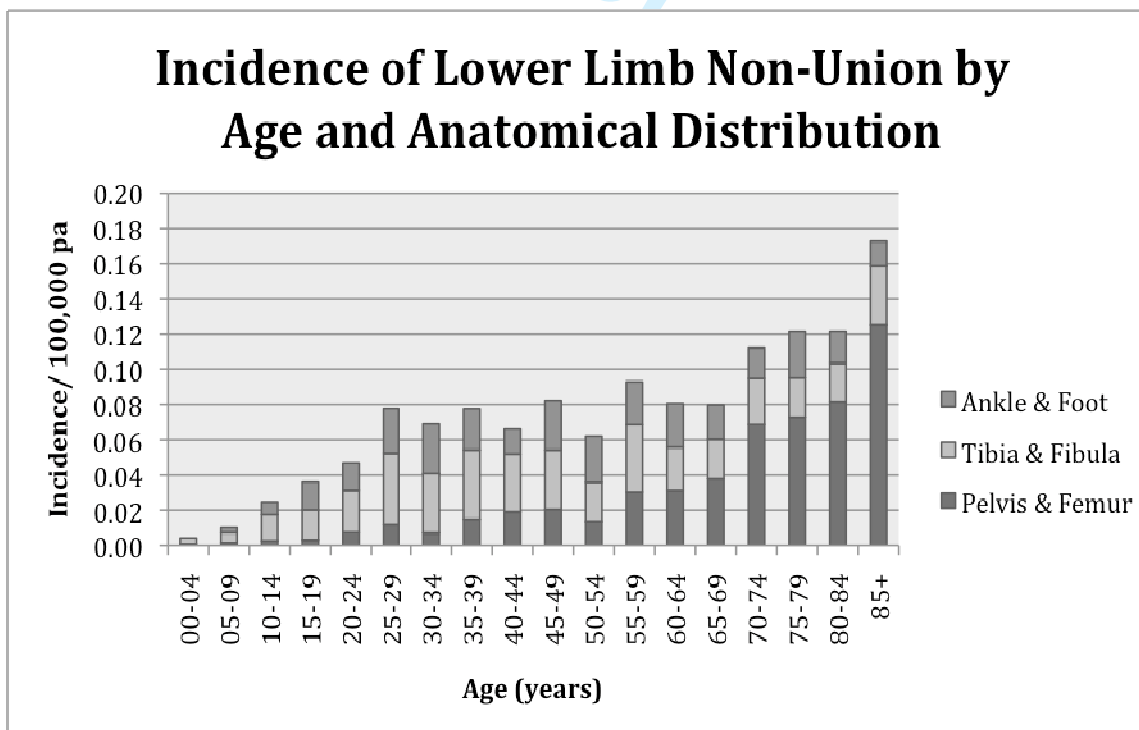

## Discussion

The [5-year](#) mean for non-union in Scotland (2005- 2010) was 18.9 per annum; 22.45 in males and 15.65 in females. Although there has been a decreasing trend in male incidence a longer period of analysis is necessary to draw any significance from it. The age /gender distribution followed a trend that [was](#) similar to the fracture pattern in the Edinburgh population<sup>6</sup> with a bimodal male and unimodal female distribution reflecting the larger number of fractures seen with higher energy injuries in the young males and the osteoporotic fractures in the elderly.

The most common site for non-union in males [was](#) the forearm and in females the [humerus](#), with the upper limb having a 60% higher incidence of non-union than the lower limb [likely in part](#) due to the [greater incidence](#) of [upper limb than lower limb](#) fractures. In a recent epidemiology study the fracture incidence was 290/100,000 for forearms and 173/ 100,000 in the upper arm and shoulder compared to 199/100,000 in the pelvic/thigh region and 55/100,000 in the lower leg<sup>4</sup>.

This study may under represent the numbers of NU, as in the elderly the potential for complications and the invasiveness of corrective surgery may outweigh the benefits of achieving union for the individual.

Previous estimates of fracture non-union have generally been derived from small cohorts of particular anatomical regions. The many study variables make comparison difficult although most studies of closed fracture injuries quote less than 15%<sup>10</sup> NU. Site specific studies have reported 1.54/ 100,000 pa in the clavicle<sup>11</sup>, 1.1/ 100,000 pa in the diaphyseal humerus<sup>12</sup> and 1.89/ 100,000pa in closed tibial fractures<sup>13</sup>

At a population level the number of non-union is potentially affected by several different factors. These include the number of fractures, the nature of the injuries (for instance high energy open tibial fractures compared to closed low energy fractures<sup>13</sup>), the incidence of infection and importantly the access of the population to health care provision and adequacy of the initial fracture treatment. In addition, there will be intrinsic host factors such as diabetes and systemic agents such as non-steroidal anti-inflammatory drugs and smoking, which inhibit the repair process and would potentially, influence the incidence of non-union.

1 For health care planning and for clinical trial design, the absolute number of non-unions is required,  
2 particularly as there is an increasing need to evaluate current and proposed new treatments for non-  
3 union.  
4  
5

6 The ISD data used in this study records all hospital episodes. As almost all non-unions are treated  
7 operatively, the ISD data is a good reflection of the number of clinically symptomatic non-unions  
8 (as was confirmed by the validation of the ISD coding carried out in our unit). Therefore the data  
9 provided here gives realistic estimates for the number of non-unions that can be expected for each  
10 anatomical region in a given time, which will enable realistic recruitment rates to be calculated.  
11  
12  
13  
14

15  
16  
17 Our data gives an overall NU incidence in Scotland of 19 per 100,000 per annum. Clearly less than  
18 the 138/ 100,000 primary hip replacements<sup>14</sup> and 572/ 100,000 registered malignant neoplasms<sup>15</sup>  
19 but on a par with 19/ 100,000 revision hip replacements<sup>14</sup>, and 13.5/ 100,000 on the renal transplant  
20 waiting list in Scotland in 2009.  
21  
22

23 An estimated 25% of non-unions are complex and require referral to a specialist unit dealing with  
24 limb reconstruction, such a unit with a catchment of 2 million would see approximately 100 non-  
25 union referrals per year. This compares to the 33 primary hip replacements performed per  
26 arthroplasty surgeon and 6.7 revision hips per 'revision' arthroplasty hip surgeon in Scotland in  
27 2009<sup>14</sup>.  
28  
29  
30  
31  
32  
33  
34

### 35 Conclusion

36 There is very little data available in the literature regarding non-union in large numbers or  
37 populations. This study reports data which can be used as a baseline to compare against rates in  
38 other regions to assess the adequacies of trauma care provision. The pattern of non-union by age,  
39 sex and anatomical distribution in a 5.2 million Scottish population, is described with a young male  
40 bimodal and elderly female unimodal distribution and a higher incidence in the upper limb than  
41 lower limb.  
42  
43  
44  
45  
46  
47  
48  
49  
50  
51  
52  
53  
54  
55  
56  
57  
58  
59  
60

## Bibliography

1. Mock C, Lormand J.D., Goosen J., Joshipura M., Peden M. Guidelines for essential trauma care. Geneva: World Health Organization, 2004.
2. Mock CN, Adzotor KE, Conklin E, Denno DM, Jurkovich GJ. Trauma outcomes in the rural developing world: comparison with an urban level I trauma center. *J Trauma* 1993;35(4):518-23.
3. Sethi D, Racioppi F, Baumgarten I, Bertollini R. Reducing inequalities from injuries in Europe. *Lancet* 2006;368(9554):2243-50.
4. Court-Brown C, Aitken SA, Forward D, O'Toole R. The Epidemiology of Adult Fractures. In: Bucholz RW, Court-Brown C, Heckman JD, Tornetta P, editors. *Rockwood and Green's fractures in adults*. 7 ed: Philadelphia, Lippincott Williams & Wilkins, 2010, 2009:53-84.
5. Dahabreh Z, Calori GM, Kanakaris NK, Nikolaou VS, Giannoudis PV. A cost analysis of treatment of tibial fracture nonunion by bone grafting or bone morphogenetic protein-7. *Int Orthop* 2009;33(5):1407-14.
6. Dahabreh Z, Dimitriou R, Giannoudis PV. Health economics: a cost analysis of treatment of persistent fracture non-unions using bone morphogenetic protein-7. *Injury* 2007;38(3):371-7.
7. Kanakaris NK, Giannoudis PV. The health economics of the treatment of long-bone non-unions. *Injury* 2007;38 Suppl 2:S77-84.
8. Patil S, Montgomery R. Management of complex tibial and femoral nonunion using the Ilizarov technique, and its cost implications. *J Bone Joint Surg Br* 2006;88(7):928-32.
9. Court-Brown CM, Caesar B. Epidemiology of adult fractures: A review. *Injury* 2006;37(8):691-7.
10. Tzioupis C, Giannoudis PV. Prevalence of long-bone non-unions. *Injury* 2007;38 Suppl 2:S3-9.
11. Robinson CM. Fractures of the clavicle in the adult. Epidemiology and classification. *J Bone Joint Surg Br* 1998;80(3):476-84.
12. Broadbent MR, Will E, McQueen MM. Prediction of outcome after humeral diaphyseal fracture. *Injury* 2010;41(6):572-7.
13. Court-Brown CM. Reamed intramedullary tibial nailing: an overview and analysis of 1106 cases. *J Orthop Trauma* 2004;18(2):96-101.
14. NoAuthorsListed. Scottish Arthroplasty Project Annual Report: [www.arthro.scot.nhs.uk/Reports/Scottish\\_Arthroplasty\\_Project\\_Report\\_2009](http://www.arthro.scot.nhs.uk/Reports/Scottish_Arthroplasty_Project_Report_2009) 2010.
15. NoAuthorListed. Cancer in Scotland (August 2011). In: Information Services Division NNSS, editor, 2011.

**STROBE 2007 (v4) checklist of items to be included in reports of observational studies in epidemiology\***  
**Checklist for cohort, case-control, and cross-sectional studies (combined)**

| Section/Topic             | Item # | Recommendation                                                                                                                                                                                                                                                                                                                                                                                                                                                         | Reported on page # |
|---------------------------|--------|------------------------------------------------------------------------------------------------------------------------------------------------------------------------------------------------------------------------------------------------------------------------------------------------------------------------------------------------------------------------------------------------------------------------------------------------------------------------|--------------------|
| Title and abstract        | 1      | (a) Indicate the study's design with a commonly used term in the title or the abstract                                                                                                                                                                                                                                                                                                                                                                                 | 1                  |
|                           |        | (b) Provide in the abstract an informative and balanced summary of what was done and what was found                                                                                                                                                                                                                                                                                                                                                                    | 1                  |
| <b>Introduction</b>       |        |                                                                                                                                                                                                                                                                                                                                                                                                                                                                        |                    |
| Background/rationale      | 2      | Explain the scientific background and rationale for the investigation being reported                                                                                                                                                                                                                                                                                                                                                                                   | 2                  |
| Objectives                | 3      | State specific objectives, including any pre-specified hypotheses                                                                                                                                                                                                                                                                                                                                                                                                      | 2                  |
| <b>Methods</b>            |        |                                                                                                                                                                                                                                                                                                                                                                                                                                                                        |                    |
| Study design              | 4      | Present key elements of study design early in the paper                                                                                                                                                                                                                                                                                                                                                                                                                | 3                  |
| Setting                   | 5      | Describe the setting, locations, and relevant dates, including periods of recruitment, exposure, follow-up, and data collection                                                                                                                                                                                                                                                                                                                                        | 3                  |
| Participants              | 6      | (a) <i>Cohort study</i> —Give the eligibility criteria, and the sources and methods of selection of participants. Describe methods of follow-up<br><i>Case-control study</i> —Give the eligibility criteria, and the sources and methods of case ascertainment and control selection. Give the rationale for the choice of cases and controls<br><i>Cross-sectional study</i> —Give the eligibility criteria, and the sources and methods of selection of participants | 3                  |
|                           |        | (b) <i>Cohort study</i> —For matched studies, give matching criteria and number of exposed and unexposed<br><i>Case-control study</i> —For matched studies, give matching criteria and the number of controls per case                                                                                                                                                                                                                                                 | n/a                |
| Variables                 | 7      | Clearly define all outcomes, exposures, predictors, potential confounders, and effect modifiers. Give diagnostic criteria, if applicable                                                                                                                                                                                                                                                                                                                               | n/a                |
| Data sources/ measurement | 8*     | For each variable of interest, give sources of data and details of methods of assessment (measurement). Describe comparability of assessment methods if there is more than one group                                                                                                                                                                                                                                                                                   | n/a                |
| Bias                      | 9      | Describe any efforts to address potential sources of bias                                                                                                                                                                                                                                                                                                                                                                                                              | n/a                |
| Study size                | 10     | Explain how the study size was arrived at                                                                                                                                                                                                                                                                                                                                                                                                                              | n/a                |
| Quantitative variables    | 11     | Explain how quantitative variables were handled in the analyses. If applicable, describe which groupings were chosen and why                                                                                                                                                                                                                                                                                                                                           | n/a                |
| Statistical methods       | 12     | (a) Describe all statistical methods, including those used to control for confounding                                                                                                                                                                                                                                                                                                                                                                                  |                    |
|                           |        | (b) Describe any methods used to examine subgroups and interactions                                                                                                                                                                                                                                                                                                                                                                                                    |                    |
|                           |        | (c) Explain how missing data were addressed                                                                                                                                                                                                                                                                                                                                                                                                                            |                    |
|                           |        | (d) <i>Cohort study</i> —If applicable, explain how loss to follow-up was addressed<br><i>Case-control study</i> —If applicable, explain how matching of cases and controls was addressed                                                                                                                                                                                                                                                                              |                    |

|                          |     |                                                                                                                                                                                                                                                                                                                                                                                                               |    |
|--------------------------|-----|---------------------------------------------------------------------------------------------------------------------------------------------------------------------------------------------------------------------------------------------------------------------------------------------------------------------------------------------------------------------------------------------------------------|----|
|                          |     | <i>Cross-sectional study</i> —If applicable, describe analytical methods taking account of sampling strategy                                                                                                                                                                                                                                                                                                  |    |
|                          |     | (e) Describe any sensitivity analyses                                                                                                                                                                                                                                                                                                                                                                         |    |
| <b>Results</b>           |     |                                                                                                                                                                                                                                                                                                                                                                                                               |    |
| Participants             | 13* | (a) Report numbers of individuals at each stage of study—eg numbers potentially eligible, examined for eligibility, confirmed eligible, included in the study, completing follow-up, and analysed<br>(b) Give reasons for non-participation at each stage<br>(c) Consider use of a flow diagram                                                                                                               | 3  |
| Descriptive data         | 14* | (a) Give characteristics of study participants (eg demographic, clinical, social) and information on exposures and potential confounders<br>(b) Indicate number of participants with missing data for each variable of interest<br>(c) <i>Cohort study</i> —Summarise follow-up time (eg, average and total amount)                                                                                           | 3  |
| Outcome data             | 15* | <i>Cohort study</i> —Report numbers of outcome events or summary measures over time<br><i>Case-control study</i> —Report numbers in each exposure category, or summary measures of exposure<br><i>Cross-sectional study</i> —Report numbers of outcome events or summary measures                                                                                                                             | 4  |
| Main results             | 16  | (a) Give unadjusted estimates and, if applicable, confounder-adjusted estimates and their precision (eg, 95% confidence interval). Make clear which confounders were adjusted for and why they were included<br>(b) Report category boundaries when continuous variables were categorized<br>(c) If relevant, consider translating estimates of relative risk into absolute risk for a meaningful time period | 4  |
| Other analyses           | 17  | Report other analyses done—eg analyses of subgroups and interactions, and sensitivity analyses                                                                                                                                                                                                                                                                                                                |    |
| <b>Discussion</b>        |     |                                                                                                                                                                                                                                                                                                                                                                                                               |    |
| Key results              | 18  | Summarise key results with reference to study objectives                                                                                                                                                                                                                                                                                                                                                      | 10 |
| Limitations              | 19  | Discuss limitations of the study, taking into account sources of potential bias or imprecision. Discuss both direction and magnitude of any potential bias                                                                                                                                                                                                                                                    | 10 |
| Interpretation           | 20  | Give a cautious overall interpretation of results considering objectives, limitations, multiplicity of analyses, results from similar studies, and other relevant evidence                                                                                                                                                                                                                                    | 11 |
| Generalisability         | 21  | Discuss the generalisability (external validity) of the study results                                                                                                                                                                                                                                                                                                                                         | 11 |
| <b>Other information</b> |     |                                                                                                                                                                                                                                                                                                                                                                                                               |    |
| Funding                  | 22  | Give the source of funding and the role of the funders for the present study and, if applicable, for the original study on which the present article is based                                                                                                                                                                                                                                                 | 1  |

\*Give information separately for cases and controls in case-control studies and, if applicable, for exposed and unexposed groups in cohort and cross-sectional studies.  
**Note:** An Explanation and Elaboration article discusses each checklist item and gives methodological background and published examples of transparent reporting. The STROBE checklist is best used in conjunction with this article (freely available on the Web sites of PLoS Medicine at <http://www.plosmedicine.org/>, Annals of Internal Medicine at <http://www.annals.org/>, and Epidemiology at <http://www.epidem.com/>). Information on the STROBE Initiative is available at [www.strobe-statement.org](http://www.strobe-statement.org).



1  
2  
3  
4  
5  
6  
7  
8  
9  
10  
11  
12  
13  
14  
15  
16  
17  
18  
19  
20  
21  
22  
23  
24  
25  
26  
27  
28  
29  
30  
31  
32  
33  
34  
35  
36  
37  
38  
39  
40  
41  
42  
43  
44  
45  
46  
47  
48  
49

For peer review only

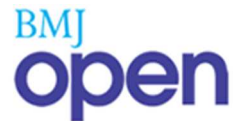

**The relative incidence of fracture non-union in the Scottish population (5.17 million), a 5 year epidemiological study.**

|                                 |                                                                                                                                                                                                                                                                                                 |
|---------------------------------|-------------------------------------------------------------------------------------------------------------------------------------------------------------------------------------------------------------------------------------------------------------------------------------------------|
| Journal:                        | <i>BMJ Open</i>                                                                                                                                                                                                                                                                                 |
| Manuscript ID:                  | bmjopen-2012-002276                                                                                                                                                                                                                                                                             |
| Article Type:                   | Research                                                                                                                                                                                                                                                                                        |
| Date Submitted by the Author:   | 01-Nov-2012                                                                                                                                                                                                                                                                                     |
| Complete List of Authors:       | Mills, Leanora; Royal National Orthopaedic Hospital, Paediatric Orthopaedics; University of Edinburgh, Department of Orthopaedics and Trauma Surgery<br>Simpson, Hamish; University of Edinburgh,                                                                                               |
| <b>Primary Subject Heading</b>: | Epidemiology                                                                                                                                                                                                                                                                                    |
| Secondary Subject Heading:      | Health economics, Surgery, Public health                                                                                                                                                                                                                                                        |
| Keywords:                       | Trauma management < ORTHOPAEDIC & TRAUMA SURGERY, EPIDEMIOLOGY, Health economics < HEALTH SERVICES ADMINISTRATION & MANAGEMENT, Adult orthopaedics < ORTHOPAEDIC & TRAUMA SURGERY, Limb reconstruction < ORTHOPAEDIC & TRAUMA SURGERY, Musculoskeletal disorders < ORTHOPAEDIC & TRAUMA SURGERY |
|                                 |                                                                                                                                                                                                                                                                                                 |

SCHOLARONE™  
Manuscripts

1  
2 TITLE: The relative incidence of fracture non-union in the Scottish population (5.17 million), a 5  
3 year epidemiological study.  
4

5  
6  
7 Corresponding author:

8 Leanora@doctors.org.uk  
9

10  
11 Authors:

12 Miss Leanora A Mills

13 Professor Hamish Simpson  
14

15  
16  
17  
18 Miss Leanora A Mills, Paediatric Orthopaedic Fellow, Royal National Orthopaedic Hospital,  
19 Brockley Hill, Stanmore, London, HA7 4LP  
20

21  
22  
23 Professor A Hamish R W Simpson, Department of Orthopaedics and Trauma Surgery, University of  
24 Edinburgh, Old Dalkeith Road, Edinburgh, EH16 4SU  
25

26  
27  
28 Key words: non-union, nonunion, fracture, incidence, epidemiology, bone.  
29

30  
31  
32 Word Count: 2100 excluding abstract and references  
33

34  
35 The Corresponding Author has the right to grant on behalf of all authors and does grant on behalf of  
36 all authors, an exclusive licence (or non exclusive for government employees) on a worldwide basis  
37 to the BMJ Publishing Group Ltd to permit this article (if accepted) to be published in BMJ editions  
38 and any other BMJ PGL products and sublicences such use and exploit all subsidiary rights, as set  
39 out in our licence.  
40

41  
42  
43 Ethical Approval

44 No ethical approval was required for this research.  
45

46  
47 Funding

48 There was no support from any organisation for the submitted work; no financial relationships with  
49 any organisations that might have an interest in the submitted work in the previous three years, no  
50 other relationships or activities that could appear to have influenced the submitted work.  
51

52  
53 Contributorship

54 The authors Miss L Mills and Prof. H Simpson have contributed to the paper regarding its design,  
55 data acquisition and analysis, both authors have been involved in the drafting and revising of the  
56 article and in the approval of the final version to be published.  
57  
58  
59  
60

1  
2 Competing Interests

3 None

4  
5 Data Sharing

6 There is no additional data available.  
7  
8  
9

10 TITLE

11 The relative incidence of fracture non-union in the Scottish population (5.17 million), a 5 year  
12 epidemiological study.  
13  
14

15  
16  
17 ABSTRACT

18 Objectives

19  
20 In the UK there are approximately 850,000 new fractures seen each year. Rates of non-union of 5-  
21 10% of fractures have been suggested, the cost to the NHS of treating non-union has been reported  
22 to range between £7,000 and £79,000 per person yet there is little actual data available. The  
23 objective of this epidemiological study therefore is for the first time to report the rates of fracture  
24 non-union.  
25  
26  
27  
28  
29

30 Design

31 A cross-sectional epidemiological study  
32  
33  
34

35 Setting

36 The population of Scotland  
37  
38  
39

40 Participants

41 All patient admissions to hospital in Scotland are coded according to diagnosis. This data is  
42 collected by (and was obtained from) ISD Scotland. Those who have been coded for a bone non-  
43 union between 2005 and 2010 were included in the study. No patients were excluded. Population  
44 data was obtained from the Registrar General for Scotland.  
45  
46  
47  
48  
49

50 Outcome measure

51 The number of fracture non-unions per 100,000 population of Scotland according to age, sex and  
52 anatomical distribution of non-union.  
53  
54  
55

56 Results  
57  
58  
59  
60

1 4895 non-unions were treated as inpatients in Scotland between 2005 and 2010, averaging 979 per  
2 year, with an overall incidence of 18.94 per 100,000 population per annum. The distribution  
3 according to gender was 57% male and 43% female. The overall peak incidence according to age  
4 was between 30 and 40 years. The mean population of Scotland between 2005-2010 was 5,169,140  
5 people.  
6  
7  
8  
9

#### 10 Conclusion

11 Fracture non-union in the population as a whole remains low at less than 20 per 100,000 population  
12 and peaks in the 4<sup>th</sup> decade of life. Further research is required to determine the risk of non-union  
13 per fracture according to age/ sex/ anatomical distribution.  
14  
15  
16  
17  
18  
19  
20  
21  
22  
23  
24  
25  
26  
27  
28  
29  
30  
31  
32  
33  
34  
35  
36  
37  
38  
39  
40  
41  
42  
43  
44  
45  
46  
47  
48  
49  
50  
51  
52  
53  
54  
55  
56  
57  
58  
59  
60

1  
2  
3  
4  
5  
6  
7  
8  
9  
10 ARTICLE SUMMARY  
11  
12

13 Article focus  
14

- 15 - The cost of treating non-union is between £7,000 and £79,000 per case in the UK
- 16 - There is no population data in the literature regarding the rate of non-union; smaller site  
17 specific cohort studies suggest it to be a complication of fracture healing in up to 5-10% of  
18 cases
- 19 - This study aims to report for the first time the rates of fracture non-union of different  
20 anatomical regions for a large population, taking into account the age and sex distribution  
21  
22  
23  
24  
25  
26  
27

28 Key messages  
29

- 30 - There were almost 1000 non-unions treated in Scotland each year between 2005 and 2010  
31 with an annual non-union incidence of 22.45 in males and 15.65 in females per 100,000  
32 population per annum
- 33 - The age/ gender distribution was bimodal in males and unimodal in females reflecting the  
34 larger number of fractures seen with higher energy injuries in the young males and the  
35 osteoporotic fractures in the elderly
- 36 - Non-union was more frequent in the upper than the lower limb, likely reflecting the higher  
37 incidence of fractures in the upper limb compared to the lower limb  
38  
39  
40  
41  
42  
43  
44  
45  
46  
47

48 Strengths and limitations  
49

- 50 - This is the first study of its kind in the literature to attempt to measure the incidence of non-  
51 union in the general population
- 52 - It is based upon a stable population of 5.17 million people
- 53 - It can be used as a baseline to compare healthcare systems and adequacy of trauma care  
54 provision elsewhere  
55  
56  
57  
58  
59  
60

- It may under represent the true incidence as it does not account for the asymptomatic non-unions (rare) which do not seek treatment or in those where the risks of surgery outweigh the benefits to the individual (also rare).
- Further research is required to look at the rate of non-union per fracture in a large population setting

For peer review only

1  
2 TITLE: The relative incidence of fracture non-union in the Scottish population (5.17 million), a 5  
3 year epidemiological study.  
4

5  
6  
7 Aim

8 To perform an epidemiological study at a national population level to determine the number (and  
9 incidence) of non-union with respect to anatomical site, sex and age.  
10  
11

12  
13 Introduction

14 The WHO recognize trauma as a major healthcare epidemic with over 16,000 people dying each  
15 day and injury accounting for 16% of the global burden of disease[1]. People in a low income  
16 setting are far more likely to suffer complications from traumatic injury than those in a high income  
17 setting; for instance Mock et al[2] report a 6 fold higher mortality rate (36% v 6%) in the severely  
18 injured between high and low income areas. Even within Europe there are major inequalities  
19 recognised in the provision of trauma care between Eastern and Western states with a 3.6 fold  
20 difference in injury related mortality between the high income and low/middle income countries[3].  
21 For every trauma-associated death there are many more injured and for these injured individuals  
22 non-union of the fracture is one of the major causes of morbidity and creates a significant drain on a  
23 country's resources. However there is a paucity of data available regarding the incidence of non-  
24 union on a national scale.  
25  
26  
27  
28  
29  
30  
31  
32  
33  
34

35 In the UK there are approximately 850,000 new fractures seen each year (based on an incidence of  
36 fresh fractures of 13.8/1000/pa[4]) of which the majority heal without difficulty.

37 Rates of non-union of 5-10% of fractures have been suggested yet there is little available data for  
38 this figure. The cost to the NHS of treating non-union has been reported to range between £7,000  
39 and £79,000 per person[5-8]. However, this does not take into account the morbidity and loss of  
40 earnings of the individual nor any long-term health burden, so the cost to society will be far greater  
41 than this.  
42  
43  
44  
45

46 Complex non-unions are best treated by a specialist limb reconstruction service. In order to plan the  
47 provision of these services, countries and health boards require data on the rates of non-union per  
48 head of population. In addition, in order to design prospective clinical research studies on non-  
49 union it is necessary to know the incidence so that realistic recruitment rates can be calculated.  
50  
51

52 The aim of this study therefore is for the first time to report the rates of fracture non-union of  
53 different anatomical regions for a large population, taking into account the age and sex distribution.  
54  
55  
56  
57  
58  
59  
60



## Method

Every patient in Scotland has a unique CHI (community health index) number. Every patient admitted into hospital in Scotland has a code attached to their CHI number when they are discharged. This individual code is derived from the ICD-10 classification and is specific for the diagnosis from that admission; it is generated by trained coders who are specialty specific in each health trust.

It is mandatory for NHS Scotland Information Services Department (ISD) to collect the all the ICD-10 data for all the hospitals in Scotland. The combination of the unique patient CHI number and ICD-10 data enables them to provide age, sex and hospital specific details for each patient treated for a non-union upon request.

Information was obtained regarding all non-unions admitted to hospital in Scotland from 2005-2010. Patients were coded as having a non-union if the responsible surgeon for that inpatient episode recorded the diagnosis of non-union in the patient notes or correspondence. All patients coded for non-union were included.

To assess the quality and consistency of hospital coding we checked the codes of 100 consecutive non-union patients whom had bent rated for NU as inpatients in Lothian over a similar time period. 97% had been correctly coded for, those that had not been had codes for malunion or osteomyelitis (which had been present in addition to the NU).

The population data for Scotland between 2005 and 2010 was obtained from the Registrar General for Scotland who publish an annual mid year population estimate with details of sex, age, council and health board.

## Results

4895 non-unions were treated as inpatients in Scotland between 2005 and 2010, averaging 979 per year, with an overall incidence of 18.94 per 100,000 population per annum. The distribution according to gender was 57% male and 43% female. The overall peak incidence according to age was between 30 and 40 years. The mean population of Scotland between 2005-2010 was 5,169,140 people.

Table 1- Non-union numbers Scotland 2005- 2010

| Site Location                                 | 0-14yrs | 15-29yrs | 30-44yrs | 45-59yrs | 60-74yrs | 75yrs+ | total |
|-----------------------------------------------|---------|----------|----------|----------|----------|--------|-------|
| Shoulder<br>Region<br>(Clavicle &<br>Scapula) | 2       | 106      | 163      | 171      | 109      | 45     | 596   |
| Upper Arm<br>(Humerus)                        | 10      | 41       | 93       | 184      | 228      | 178    | 734   |
| Forearm<br>(Radius &<br>Ulna)                 | 79      | 435      | 359      | 166      | 129      | 58     | 1226  |
| Hand                                          | 3       | 120      | 65       | 37       | 13       | 3      | 241   |
| Pelvis &<br>Femur                             | 7       | 38       | 76       | 114      | 169      | 175    | 579   |
| Lower Leg<br>(Patella, Tibia<br>& Fibula)     | 35      | 137      | 189      | 168      | 94       | 49     | 672   |
| Ankle & Foot                                  | 15      | 95       | 113      | 141      | 81       | 41     | 486   |
| Axial skeleton                                | 0       | 15       | 13       | 13       | 30       | 17     | 88    |
| Multiple Sites                                | 0       | 4        | 2        | 3        | 2        | 1      | 12    |
| No Additional<br>Detail                       | 29      | 51       | 60       | 46       | 47       | 28     | 261   |
| Total                                         | 180     | 1042     | 1133     | 1043     | 902      | 595    | 4895  |

Overall the actual numbers of non-unions treated were distributed fairly evenly across the ages from 15 to 75 years (table 1). The majority of non-unions occurred in the working aged population.

However the incidence per capita demonstrated a different distribution. As expected less than 4% of

1 non-unions were accounted for by the paediatric population with 66% in the 15- 60 year olds and  
 2 30% in those older than 60 years.  
 3  
 4

5  
 6  
 7 5-year trend of non-union (table 2).

8 The mean incidence of NU over the 5 year period was 22.45 in males and 15.65 in females per  
 9 100,000 population per annum. The incidence of non-union in females has remained constant over  
 10 11 the past 5 years. In males it has fallen, with a 9.3% drop in non-union numbers despite a rise in the  
 12 13 male population, thus the non-union incidence has fallen by 10.5% either due to a fall in the fracture  
 14 15 incidence or improvement in overall management and healing of fractures since 2005. Non-union  
 16 17 incidence has remained consistently higher in the male compared to the female population although  
 18 19 with the fall in numbers of non-union in male patients the gap has narrowed.  
 20  
 21  
 22  
 23

24 Table 2. A 5-year summary of non-union from 2005 to 2010

| NU patient numbers |        |       |       | Incidence/ 100,000 |       |       |
|--------------------|--------|-------|-------|--------------------|-------|-------|
| Year               | Female | Male  | Total | Female             | Male  | Total |
| 2005/06            | 402    | 619   | 1021  | 15.18              | 25.07 | 19.95 |
| 2006/07            | 419    | 559   | 978   | 15.76              | 22.49 | 19.01 |
| 2007/08            | 420    | 576   | 996   | 15.74              | 23.04 | 19.27 |
| 2008/09            | 426    | 532   | 958   | 15.9               | 21.15 | 18.44 |
| 2009/10            | 421    | 521   | 942   | 15.64              | 20.59 | 18.04 |
| 5 year mean        | 417.6  | 561.4 | 979   | 15.65              | 22.45 | 18.94 |

25  
 26  
 27  
 28  
 29  
 30  
 31  
 32  
 33  
 34  
 35  
 36  
 37  
 38  
 39  
 40  
 41  
 42  
 43  
 44  
 45  
 46  
 47  
 48  
 49 Distribution of non-union with age and sex

50 Graph 1 demonstrates that the pattern of non-union varied in three age groups; the paediatric  
 51 52 population had a very low incidence (less than 5 per 100,000 per annum) followed by a sharp rise  
 53 54 and a plateau which was observed in the 20- 70 year age group at around 20 NU per 100,000  
 55 56 population per year. A second rise and further plateau was observed in the elderly at about 28 per  
 57 58 100,000 per annum.  
 59  
 60

1  
2  
3  
4  
5  
6  
7  
8  
9  
10  
11  
12  
13  
14  
15  
16  
17  
18  
19  
20  
21  
22  
23  
24  
25  
26  
27  
28  
29  
30  
31  
32  
33  
34  
35  
36  
37  
38  
39  
40  
41  
42  
43  
44  
45  
46  
47  
48  
49  
50  
51  
52  
53  
54  
55  
56  
57  
58  
59  
60

When the data was divided into the separate sexes a different pattern was evident. In the males there was a high peak in the early adult years (25-29 year olds), accounted for mostly by forearm non-union, followed by a gradual decline in incidence and a second small peak in the eighth decade due to a rise in the incidence of humeral and femur/ pelvis non-unions. In the female population there was a consistently steady increase in NU incidence from childhood onwards with the female incidence over taking that of the males in the 50-60 year age group and peaking in the 75-79 year age group. Similar to the male population, this peak was predominantly due to an increased incidence of humeral and femoral/ pelvis non-unions.

This distribution of non-union reflected the bimodal (male) and unimodal (female) distribution of fresh fractures that has been reported with age and sex in adults<sup>[9]</sup>.

### Anatomical distribution of non-union

Table 3 and graphs 2a and b detail the incidence of non-union by site and age. Non-union occurred 60% more frequently in the upper than the lower limb. 5% of non-union patients coded had data unavailable regarding their specific anatomical site.

Notably the forearm had the highest NU rate overall, 2.5 times more common in males (6.68/100,000) than in females (2.79/100,000) with the majority of cases occurred in the younger population. The hand had one of the lowest rates of NU and these occurred predominantly in the young male patients (1.5/100,000) compared to females (0.4/100,000).

The humerus was the most frequent site of NU in females (3.54 per 100,000 population) and this became a greater problem with increasing age, representing the increasing number of osteopaenia related proximal humerus fractures in the elderly. The shoulder, which was predominantly the clavicle, was affected 50% more frequently in males but with a more even distribution across the ages.

In the lower limb, NU of the femur and pelvis was more common in females, the incidence increased from the sixth decade upwards following a similar trend to that of the humerus. The highest rate of non-union in the lower limb was seen in the male leg: Non-union of the tibia and fibula was the second highest site of non-union overall, 70% more frequent than any other area of the lower limb and twice as common in males (3.4/100,000) than in females (1.8/100,000). NU of the foot and ankle was evenly distributed between the sexes and across the ages.

Non-union of multiple sites and the axial skeleton was very rare.

Table 3. Incidence of non-union by sex and anatomy

| Site Location                 | Female<br>incidence /100,000 pa | Male<br>incidence /100,000 pa | Total<br>incidence /100,000 pa |
|-------------------------------|---------------------------------|-------------------------------|--------------------------------|
| Shoulder Region<br>(Clavicle) | 1.87                            | 2.77                          | 2.31                           |

|                               |       |       |       |
|-------------------------------|-------|-------|-------|
| Upper Arm<br>(Humerus)        | 3.54  | 2.1   | 2.84  |
| Forearm<br>(Radius & Ulna)    | 2.79  | 6.83  | 4.74  |
| Hand                          | 0.4   | 1.5   | 0.93  |
| Upper limb total              | 8.6   | 13.2  | 10.82 |
| Pelvis & Femur                | 2.43  | 2.04  | 2.24  |
| Lower Leg<br>(Tibia & Fibula) | 1.83  | 3.42  | 2.6   |
| Ankle & Foot                  | 1.77  | 2     | 1.88  |
| Lower limb total              | 6.02  | 7.46  | 6.72  |
| Multiple Sites                | 0.04  | 0.06  | 0.05  |
| Axial skeleton                | 0.25  | 0.44  | 0.34  |
| Total                         | 15.65 | 22.45 | 18.94 |

ew only

1  
2  
3  
4  
5  
6  
7  
8  
9  
10  
11  
12  
13  
14  
15  
16  
17  
18  
19  
20  
21  
22  
23  
24  
25  
26  
27  
28  
29  
30  
31  
32  
33  
34  
35  
36  
37  
38  
39  
40  
41  
42  
43  
44  
45  
46  
47  
48  
49  
50  
51  
52  
53  
54  
55  
56  
57  
58  
59  
60

For peer review only

## Discussion

The 5-year mean for non-union in Scotland (2005- 2010) was 18.9 per 100,000 per annum; 22.45 in males and 15.65 in females. Although there has been a decreasing trend in male incidence a longer period of analysis is necessary to draw any significance from it. The age /gender distribution followed a trend that was similar to the fracture pattern in the Edinburgh population<sup>6</sup> with a bimodal male and unimodal female distribution reflecting the larger number of fractures seen with higher energy injuries in the young males and the osteoporotic fractures in the elderly.

The most common site for non-union in males was the forearm and in females the humerus, with the upper limb having a 60% higher incidence of non-union than the lower limb likely in part due to the greater incidence of upper limb than lower limb fractures. In a recent epidemiology study the fracture incidence was 290/100,000 for forearms and 173/ 100,000 in the upper arm and shoulder compared to 199/100,000 in the pelvic/thigh region and 55/100,000 in the lower leg[4].

This study may under represent the numbers of NU, as in the elderly the potential for complications and the invasiveness of corrective surgery may outweigh the benefits of achieving union for the individual.

Previous estimates of fracture non-union have generally been derived from small cohorts of particular anatomical regions. The many study variables make comparison difficult although most studies of closed fracture injuries quote less than 15%[10] NU. Site specific studies have reported 1.54/ 100,000 pa in the clavicle[11], 1.1/ 100,000 pa in the diaphyseal humerus[12] and 1.89/ 100,000pa in closed tibial fractures[13]

At a population level the number of non-union is potentially affected by several different factors. These include the number of fractures, the nature of the injuries (for instance high energy open tibial fractures compared to closed low energy fractures[13]), the incidence of infection and importantly the access of the population to health care provision and adequacy of the initial fracture treatment. In addition, there will be intrinsic host factors such as diabetes and systemic agents such as non-steroidal anti-inflammatory drugs and smoking, which inhibit the repair process and would potentially, influence the incidence of non-union.



1 For health care planning and for clinical trial design, the absolute number of non-unions is required,  
2 particularly as there is an increasing need to evaluate current and proposed new treatments for non-  
3 union.  
4  
5

6 The ISD data used in this study records all hospital episodes. As almost all non-unions are treated  
7 operatively, the ISD data is a good reflection of the number of clinically symptomatic non-unions  
8 (as was confirmed by the validation of the ISD coding carried out in our unit). Therefore the data  
9 provided here gives realistic estimates for the number of non-unions that can be expected for each  
10 anatomical region in a given time, which will enable realistic recruitment rates to be calculated.  
11  
12  
13  
14

15  
16  
17 Our data gives an overall NU incidence in Scotland of 19 per 100,000 per annum. Clearly less than  
18 the 138/ 100,000 primary hip replacements[14] and 572/ 100,000 registered malignant  
19 neoplasms[15] but on a par with 19/ 100,000 revision hip replacements[14], and 13.5/ 100,000 on  
20 the renal transplant waiting list in Scotland in 2009.  
21  
22

23 An estimated 25% of non-unions are complex and require referral to a specialist unit dealing with  
24 limb reconstruction, such a unit with a catchment of 2 million would see approximately 100 non-  
25 union referrals per year. This compares to the 33 primary hip replacements performed per  
26 arthroplasty surgeon and 6.7 revision hips per 'revision' arthroplasty hip surgeon in Scotland in  
27 2009[14].  
28  
29  
30  
31  
32  
33  
34

### 35 Conclusion

36 There is very little data available in the literature regarding non-union in large numbers or  
37 populations. This study reports data which can be used as a baseline to compare against rates in  
38 other regions to assess the adequacies of trauma care provision. The pattern of non-union by age,  
39 sex and anatomical distribution in a 5.2 million Scottish population, is described with a young male  
40 bimodal and elderly female unimodal distribution and a higher incidence in the upper limb than  
41 lower limb.  
42  
43  
44  
45  
46  
47  
48  
49  
50  
51  
52  
53  
54  
55  
56  
57  
58  
59  
60

## Bibliography

1. Mock C, Lormand J.D., Goosen J., et al. Guidelines for essential trauma care. Geneva: World Health Organization, 2004.
2. Mock CN, Adzotor KE, Conklin E, et al. Trauma outcomes in the rural developing world: comparison with an urban level I trauma center. *J Trauma* 1993;**35**(4):518-23
3. Sethi D, Racioppi F, Baumgarten I, et al. Reducing inequalities from injuries in Europe. *Lancet* 2006;**368**(9554):2243-50 doi: S0140-6736(06)68895-8 [pii]  
10.1016/S0140-6736(06)68895-8[published Online First: Epub Date]].
4. Court-Brown C, Aitken SA, Forward D, et al. The Epidemiology of Adult Fractures. In: Bucholz RW, Court-Brown C, Heckman JD, Tornetta P, eds. *Rockwood and Green's fractures in adults*. 7 ed: Philadelphia, Lippincott Williams & Wilkins, 2010, 2009:53-84.
5. Dahabreh Z, Calori GM, Kanakaris NK, et al. A cost analysis of treatment of tibial fracture nonunion by bone grafting or bone morphogenetic protein-7. *Int Orthop* 2009;**33**(5):1407-14 doi: 10.1007/s00264-008-0709-6[published Online First: Epub Date]].
6. Dahabreh Z, Dimitriou R, Giannoudis PV. Health economics: a cost analysis of treatment of persistent fracture non-unions using bone morphogenetic protein-7. *Injury* 2007;**38**(3):371-7 doi: S0020-1383(06)00545-6 [pii]  
10.1016/j.injury.2006.08.055[published Online First: Epub Date]].
7. Kanakaris NK, Giannoudis PV. The health economics of the treatment of long-bone non-unions. *Injury* 2007;**38 Suppl 2**:S77-84 doi: S0020-1383(07)80012-X [pii][published Online First: Epub Date]].
8. Patil S, Montgomery R. Management of complex tibial and femoral nonunion using the Ilizarov technique, and its cost implications. *J Bone Joint Surg Br* 2006;**88**(7):928-32 doi: 88-B/7/928 [pii]  
10.1302/0301-620X.88B7.17639[published Online First: Epub Date]].
9. Court-Brown CM, Caesar B. Epidemiology of adult fractures: A review. *Injury* 2006;**37**(8):691-7 doi: S0020-1383(06)00323-8 [pii]  
10.1016/j.injury.2006.04.130[published Online First: Epub Date]].
10. Tzioupis C, Giannoudis PV. Prevalence of long-bone non-unions. *Injury* 2007;**38 Suppl 2**:S3-9 doi: S0020-1383(07)80003-9 [pii][published Online First: Epub Date]].
11. Robinson CM. Fractures of the clavicle in the adult. Epidemiology and classification. *J Bone Joint Surg Br* 1998;**80**(3):476-84
12. Broadbent MR, Will E, McQueen MM. Prediction of outcome after humeral diaphyseal fracture. *Injury* 2010;**41**(6):572-7 doi: S0020-1383(09)00505-1 [pii]  
10.1016/j.injury.2009.09.023[published Online First: Epub Date]].

1  
2 13. Court-Brown CM. Reamed intramedullary tibial nailing: an overview and analysis of 1106  
3 cases. J Orthop Trauma 2004;**18**(2):96-101 doi: 00005131-200402000-00007 [pii][published Online  
4 First: Epub Date].  
5

6  
7 14. NoAuthorsListed. Scottish Arthroplasty Project Annual Report:  
8 [www.arthro.scot.nhs.uk/Reports/Scottish\\_Arthroplasty\\_Project\\_Report\\_2009](http://www.arthro.scot.nhs.uk/Reports/Scottish_Arthroplasty_Project_Report_2009) 2010.  
9

10 15. NoAuthorListed. Cancer in Scotland (August 2011). In: Information Services Division NNSS,  
11 ed., 2011.  
12  
13  
14  
15  
16  
17  
18  
19  
20  
21  
22  
23  
24  
25  
26  
27  
28  
29  
30  
31  
32  
33  
34  
35  
36  
37  
38  
39  
40  
41  
42  
43  
44  
45  
46  
47  
48  
49  
50  
51  
52  
53  
54  
55  
56  
57  
58  
59  
60

For peer review only

**STROBE 2007 (v4) checklist of items to be included in reports of observational studies in epidemiology\***  
**Checklist for cohort, case-control, and cross-sectional studies (combined)**

| Section/Topic             | Item # | Recommendation                                                                                                                                                                                                                                                                                                                                                                                                                                                         | Reported on page # |
|---------------------------|--------|------------------------------------------------------------------------------------------------------------------------------------------------------------------------------------------------------------------------------------------------------------------------------------------------------------------------------------------------------------------------------------------------------------------------------------------------------------------------|--------------------|
| Title and abstract        | 1      | (a) Indicate the study's design with a commonly used term in the title or the abstract                                                                                                                                                                                                                                                                                                                                                                                 | 1                  |
|                           |        | (b) Provide in the abstract an informative and balanced summary of what was done and what was found                                                                                                                                                                                                                                                                                                                                                                    | 1                  |
| <b>Introduction</b>       |        |                                                                                                                                                                                                                                                                                                                                                                                                                                                                        |                    |
| Background/rationale      | 2      | Explain the scientific background and rationale for the investigation being reported                                                                                                                                                                                                                                                                                                                                                                                   | 2                  |
| Objectives                | 3      | State specific objectives, including any pre-specified hypotheses                                                                                                                                                                                                                                                                                                                                                                                                      | 2                  |
| <b>Methods</b>            |        |                                                                                                                                                                                                                                                                                                                                                                                                                                                                        |                    |
| Study design              | 4      | Present key elements of study design early in the paper                                                                                                                                                                                                                                                                                                                                                                                                                | 2                  |
| Setting                   | 5      | Describe the setting, locations, and relevant dates, including periods of recruitment, exposure, follow-up, and data collection                                                                                                                                                                                                                                                                                                                                        | 2                  |
| Participants              | 6      | (a) <i>Cohort study</i> —Give the eligibility criteria, and the sources and methods of selection of participants. Describe methods of follow-up<br><i>Case-control study</i> —Give the eligibility criteria, and the sources and methods of case ascertainment and control selection. Give the rationale for the choice of cases and controls<br><i>Cross-sectional study</i> —Give the eligibility criteria, and the sources and methods of selection of participants | 2                  |
|                           |        | (b) <i>Cohort study</i> —For matched studies, give matching criteria and number of exposed and unexposed<br><i>Case-control study</i> —For matched studies, give matching criteria and the number of controls per case                                                                                                                                                                                                                                                 | n/a                |
| Variables                 | 7      | Clearly define all outcomes, exposures, predictors, potential confounders, and effect modifiers. Give diagnostic criteria, if applicable                                                                                                                                                                                                                                                                                                                               | n/a                |
| Data sources/ measurement | 8*     | For each variable of interest, give sources of data and details of methods of assessment (measurement). Describe comparability of assessment methods if there is more than one group                                                                                                                                                                                                                                                                                   | n/a                |
| Bias                      | 9      | Describe any efforts to address potential sources of bias                                                                                                                                                                                                                                                                                                                                                                                                              | n/a                |
| Study size                | 10     | Explain how the study size was arrived at                                                                                                                                                                                                                                                                                                                                                                                                                              | n/a                |
| Quantitative variables    | 11     | Explain how quantitative variables were handled in the analyses. If applicable, describe which groupings were chosen and why                                                                                                                                                                                                                                                                                                                                           | n/a                |
| Statistical methods       | 12     | (a) Describe all statistical methods, including those used to control for confounding                                                                                                                                                                                                                                                                                                                                                                                  |                    |
|                           |        | (b) Describe any methods used to examine subgroups and interactions                                                                                                                                                                                                                                                                                                                                                                                                    |                    |
|                           |        | (c) Explain how missing data were addressed                                                                                                                                                                                                                                                                                                                                                                                                                            |                    |
|                           |        | (d) <i>Cohort study</i> —If applicable, explain how loss to follow-up was addressed<br><i>Case-control study</i> —If applicable, explain how matching of cases and controls was addressed                                                                                                                                                                                                                                                                              |                    |

|                          |     |                                                                                                                                                                                                                                                                                                                                                                                                               |       |
|--------------------------|-----|---------------------------------------------------------------------------------------------------------------------------------------------------------------------------------------------------------------------------------------------------------------------------------------------------------------------------------------------------------------------------------------------------------------|-------|
|                          |     | <i>Cross-sectional study</i> —If applicable, describe analytical methods taking account of sampling strategy                                                                                                                                                                                                                                                                                                  |       |
|                          |     | (e) Describe any sensitivity analyses                                                                                                                                                                                                                                                                                                                                                                         |       |
| <b>Results</b>           |     |                                                                                                                                                                                                                                                                                                                                                                                                               |       |
| Participants             | 13* | (a) Report numbers of individuals at each stage of study—eg numbers potentially eligible, examined for eligibility, confirmed eligible, included in the study, completing follow-up, and analysed<br>(b) Give reasons for non-participation at each stage<br>(c) Consider use of a flow diagram                                                                                                               | 5     |
| Descriptive data         | 14* | (a) Give characteristics of study participants (eg demographic, clinical, social) and information on exposures and potential confounders<br>(b) Indicate number of participants with missing data for each variable of interest<br>(c) <i>Cohort study</i> —Summarise follow-up time (eg, average and total amount)                                                                                           | 5     |
| Outcome data             | 15* | <i>Cohort study</i> —Report numbers of outcome events or summary measures over time<br><i>Case-control study</i> —Report numbers in each exposure category, or summary measures of exposure<br><i>Cross-sectional study</i> —Report numbers of outcome events or summary measures                                                                                                                             | 5     |
| Main results             | 16  | (a) Give unadjusted estimates and, if applicable, confounder-adjusted estimates and their precision (eg, 95% confidence interval). Make clear which confounders were adjusted for and why they were included<br>(b) Report category boundaries when continuous variables were categorized<br>(c) If relevant, consider translating estimates of relative risk into absolute risk for a meaningful time period | 5     |
| Other analyses           | 17  | Report other analyses done—eg analyses of subgroups and interactions, and sensitivity analyses                                                                                                                                                                                                                                                                                                                |       |
| <b>Discussion</b>        |     |                                                                                                                                                                                                                                                                                                                                                                                                               |       |
| Key results              | 18  | Summarise key results with reference to study objectives                                                                                                                                                                                                                                                                                                                                                      | 5-13  |
| Limitations              | 19  | Discuss limitations of the study, taking into account sources of potential bias or imprecision. Discuss both direction and magnitude of any potential bias                                                                                                                                                                                                                                                    | 12    |
| Interpretation           | 20  | Give a cautious overall interpretation of results considering objectives, limitations, multiplicity of analyses, results from similar studies, and other relevant evidence                                                                                                                                                                                                                                    | 12-13 |
| Generalisability         | 21  | Discuss the generalisability (external validity) of the study results                                                                                                                                                                                                                                                                                                                                         | 12-13 |
| <b>Other information</b> |     |                                                                                                                                                                                                                                                                                                                                                                                                               |       |
| Funding                  | 22  | Give the source of funding and the role of the funders for the present study and, if applicable, for the original study on which the present article is based                                                                                                                                                                                                                                                 | 1     |

\*Give information separately for cases and controls in case-control studies and, if applicable, for exposed and unexposed groups in cohort and cross-sectional studies.

**Note:** An Explanation and Elaboration article discusses each checklist item and gives methodological background and published examples of transparent reporting. The STROBE checklist is best used in conjunction with this article (freely available on the Web sites of PLoS Medicine at <http://www.plosmedicine.org/>, Annals of Internal Medicine at <http://www.annals.org/>, and Epidemiology at <http://www.epidem.com/>). Information on the STROBE Initiative is available at [www.strobe-statement.org](http://www.strobe-statement.org).

1  
2  
3  
4  
5  
6  
7  
8  
9  
10  
11  
12  
13  
14  
15  
16  
17  
18  
19  
20  
21  
22  
23  
24  
25  
26  
27  
28  
29  
30  
31  
32  
33  
34  
35  
36  
37  
38  
39  
40  
41  
42  
43  
44  
45  
46  
47  
48  
49

For peer review only

1  
2  
3  
4  
5  
6  
7  
8  
9  
10  
11  
12  
13  
14  
15  
16  
17  
18  
19  
20  
21  
22  
23  
24  
25  
26  
27  
28  
29  
30  
31  
32  
33  
34  
35  
36  
37  
38  
39  
40  
41  
42  
43  
44  
45  
46  
47  
48  
49  
50  
51  
52  
53  
54  
55  
56  
57  
58  
59  
60

Graph 1- Incidence of non-union with age and sex

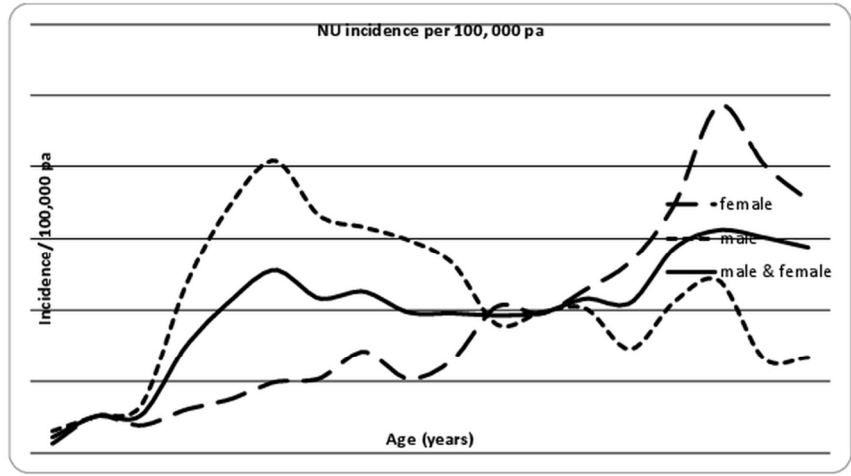

108x90mm (300 x 300 DPI)

For peer review only

1  
2  
3  
4  
5  
6  
7  
8  
9  
10  
11  
12  
13  
14  
15  
16  
17  
18  
19  
20  
21  
22  
23  
24  
25  
26  
27  
28  
29  
30  
31  
32  
33  
34  
35  
36  
37  
38  
39  
40  
41  
42  
43  
44  
45  
46  
47  
48  
49  
50  
51  
52  
53  
54  
55  
56  
57  
58  
59  
60

Graph 2a & 2b- distribution of non-union by site and age, upper and lower limb

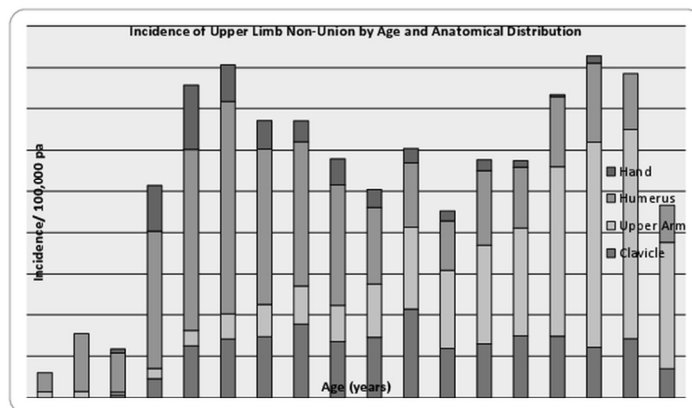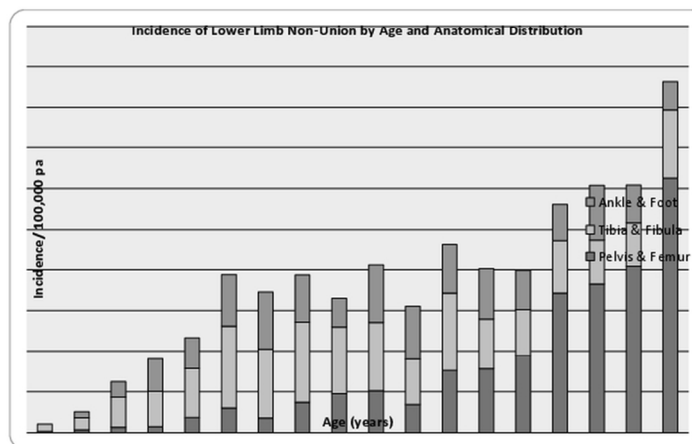

90x116mm (300 x 300 DPI)
